# Supplementary material for: A simple highly sensitive and selective TURN-ON fluorescent chemosensor for the detection of cadmium ions in physiological conditions
Source: Royal Society of Chemistry journal article supplement (doi:10.1039/c5ra10612e), 2015-01-01
Supplement: c5ra10612e1.pdf [file c5ra10612e1.pdf]

1  
2  
3  
4  
5  
6  
7  
8  
9  
10  
11  
12  
13  
14  
15  
16  
17  
18  
19  
20  
21  
22  
23  
24  
25  
26  
27

Supporting Information for

**A Simple Highly Sensitive and Selective TURN-ON Fluorescent Chemosensor for the  
Detection of Cadmium Ions in Physiological Condition**

Sundaram Ellairaja<sup>a</sup>, Ramar Manikandan<sup>b</sup>, Muthunanthavar Vijayan<sup>c</sup>, Seenivasan Rajagopal<sup>a</sup>, Vairathevar  
Sivasamy Vasantha<sup>a\*</sup>

<sup>a</sup> School of Chemistry, Madurai Kamaraj University, Madurai-625021, Tamilnadu, India.

<sup>b</sup> University of Madras, Chennai-600035, Tamilnadu, India.

<sup>c</sup> Central Electro Chemical Research Institute, Karaikudi, Tamilnadu, India.

\*Corresponding Author

Email id: [vasantham999@yahoo.co.in](mailto:vasantham999@yahoo.co.in) (V. S. Vasantha)

Tel: 91-452-2458246; Fax: 91-452-2459139

28  
29  
30  
31  
32  
33  
34  
35  
36  
37  
38  
39  
40  
41  
42  
43  
44  
45  
46  
47  
48  
49  
50  
51  
52  
53  
54  
55  
56  
57  
58  
59  
60

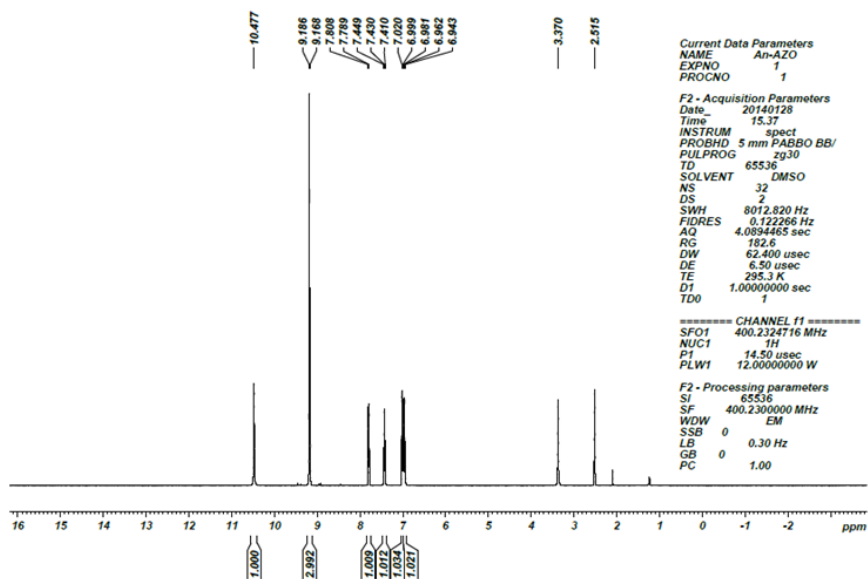

Fig. S1 <sup>1</sup>H NMR of the probe synthesized.

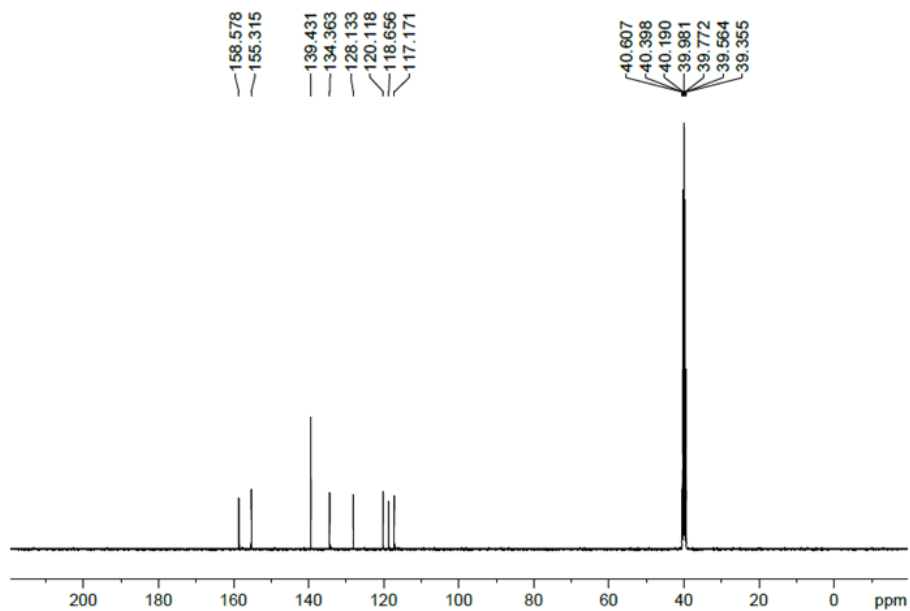

Fig. S2 <sup>13</sup>C NMR of the probe synthesized.

61  
62  
63  
64  
65  
66  
67  
68  
69  
70  
71  
72  
73  
74  
75  
76  
77  
78  
79  
80  
81  
82  
83  
84  
85  
86  
87  
88  
89  
90  
91  
92  
93

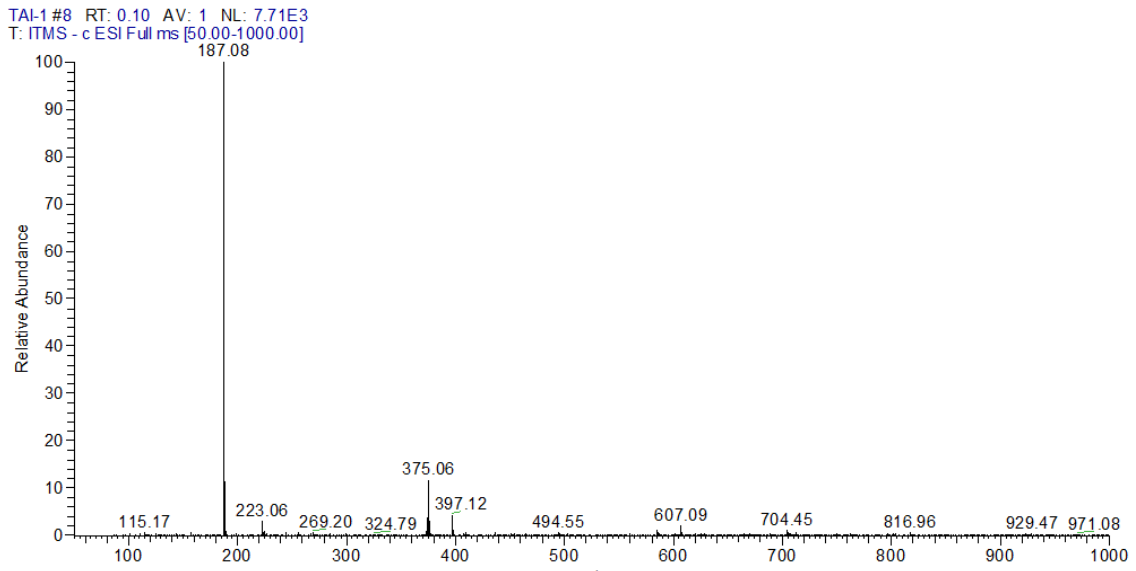

**Fig. S3** Mass Spectra of the synthesized probe.

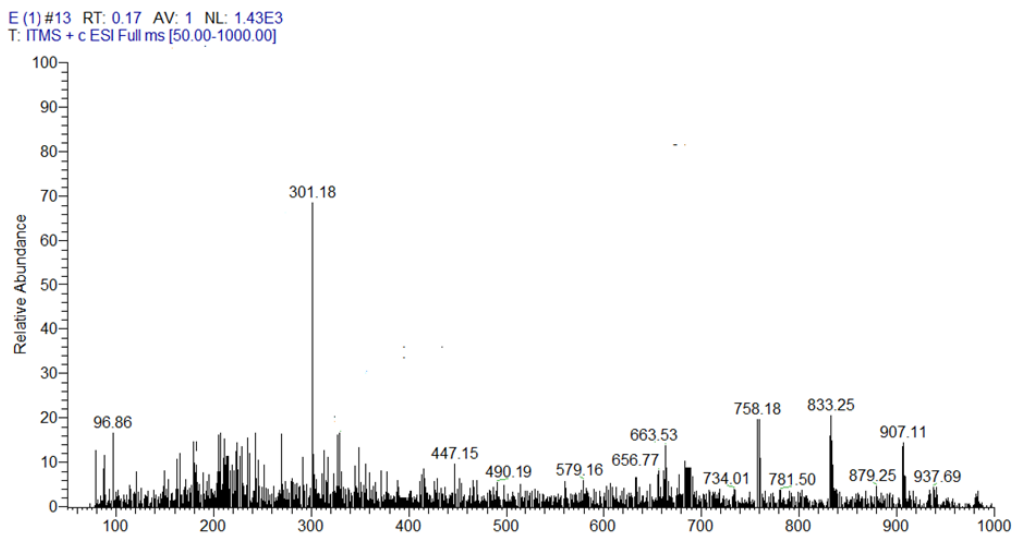

**Fig. S4** Mass Spectra of the synthesized probe-Cd<sup>2+</sup> ions

94  
95  
96  
97  
98  
99  
100  
101  
102  
103  
104  
105  
106  
107  
108  
109  
110  
111  
112  
113  
114  
115  
116  
117  
118  
119  
120  
121  
122  
123  
124

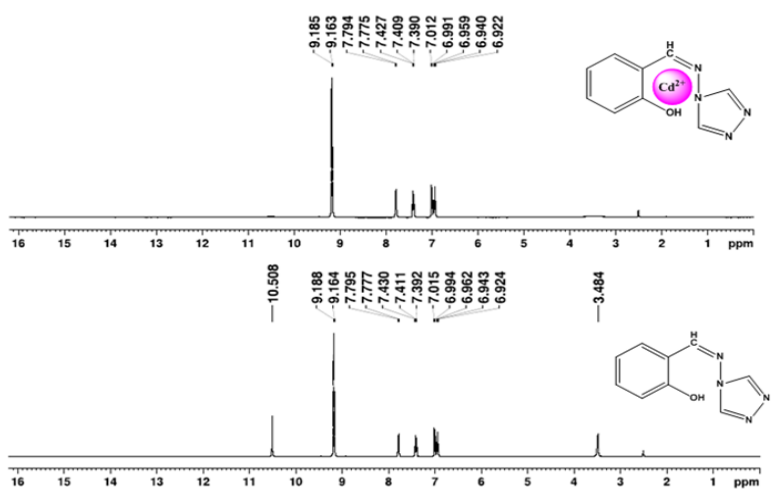

Fig. S5 <sup>1</sup>H-NMR spectral titrations (400 MHz) of probe (1 equiv) in DMSO (Bottom); Probe + 1.0 equiv Cd<sup>2+</sup> ions (Top)

125 **Reversibility test with EDTA**

126

127

128

129

130

131

132

133

134

135

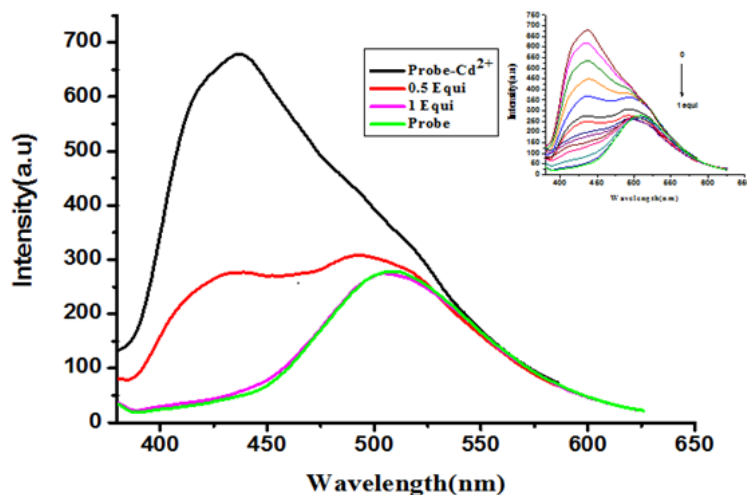

136 **Fig. S6 Reversibility test of the developed chemosensor with EDTA. (green) probe alone; (pink)**  
137 **EDTA (1 equivalent) in presence of probe-Cd<sup>2+</sup> ion ; (Red) EDTA (0.5 equivalent) in presence of**  
138 **probe-Cd<sup>2+</sup> ion ; (black) the initial fluorescence intensity of probe –Cd<sup>2+</sup> ion. The concentration of**  
139 **probe and EDTA is 5μM and the excitation wavelength was 332 nm. Excitation and emission slit**  
140 **widths are 5 nm and 2.5 nm respectively. The emission intensity at 436 nm was used for this study.**  
141 **[Inset: The complete emission spectra for the variation of EDTA with probe –Cd<sup>2+</sup> ion.**

142 **Fluorescence quenching in presence of interfering metal ions**

143

144

145

146

147

148

149

150

151

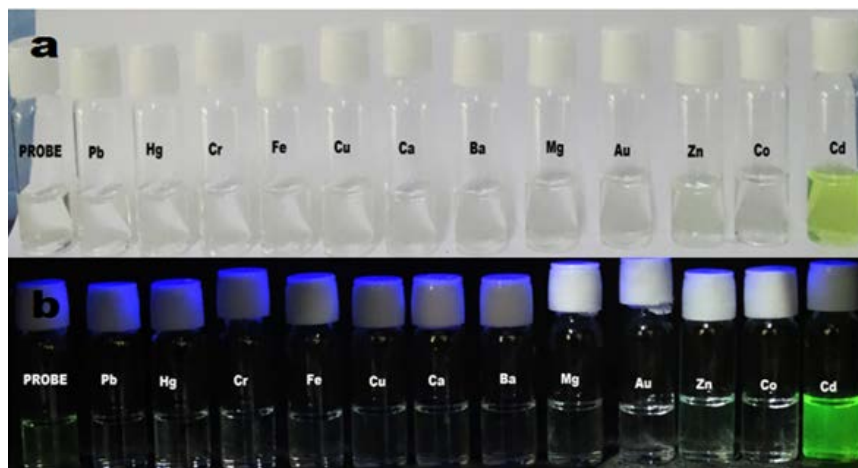

152 **Fig. S7 Color changes observed during selectivity assay (a) Naked eye (b) Under UV lamp**
